# Supplementary material for: Can Near-Infrared Spectroscopy Replace a Panel of Tasters in Sensory Analysis of Dry-Cured Bísaro Loin?
Source: MDPI journal article supplement (doi:10.3390/foods12234335), 2023-12-01
Supplement: s1 [file s1]

**Table S1.** Parameters and figures of merit of the best PLS models obtained for each sensory attribute.

| Attribute          | LVs | Calibration * |                | Prediction * |                | Durbin-Watson |        |
|--------------------|-----|---------------|----------------|--------------|----------------|---------------|--------|
|                    |     | RMSE          | R <sup>2</sup> | RMSE         | R <sup>2</sup> | DW            | pDW    |
| Odor               | 8   | 0.4054        | 0.3822         | 0.4705       | 0.2585         | 2.260         | 0.2974 |
| Andros             | 7   | 0.2785        | 0.4959         | 0.2980       | 0.4405         | 1.931         | 0.6728 |
| Scatol             | 3   | 0.3237        | 0.0847         | 0.2772       | 0.1415         | 1.977         | 0.8259 |
| Lean color         | 7   | 0.3974        | 0.2614         | 0.3685       | 0.1882         | 1.968         | 0.7954 |
| Fat color          | 7   | 0.4703        | 0.3509         | 0.5725       | 0.0691         | 2.249         | 0.3218 |
| Hardness           | 7   | 0.5356        | 0.3822         | 0.4805       | 0.2992         | 2.114         | 0.6959 |
| Juiciness          | 9   | 0.4591        | 0.6205         | 0.5378       | 0.3304         | 2.101         | 0.7417 |
| Chewiness          | 8   | 0.3726        | 0.5814         | 0.3010       | 0.6644         | 1.725         | 0.1745 |
| Flavor intensity   | 5   | 0.3211        | 0.4124         | 0.3299       | 0.3738         | 1.729         | 0.1851 |
| Flavor persistence | 8   | 0.3428        | 0.5145         | 0.3618       | 0.3811         | 2.044         | 0.9384 |

\* All models used MSC pretreatment and autoscaling normalization; MSC- multiplicative scatter correction; Andros- odor androsterone; RMSE- root mean square error; R<sup>2</sup>- coefficient of determination; DW- Durbin-Watson value; pDW – p-value for Durbin-Watson test; LVs – latent variables.
